# Supplementary material
Source: publisher figshare collection journal article supplement (https://karger.figshare.com/ndownloader/files/8955757)
Supplement: Supplementary file 1 [file 8955757]

## Erratum

---

The following authors' corrections were added after print to the paper by Porta et al: Issues related to deep brain stimulation for treatment-refractory Tourette's syndrome. *Eur Neurol* 2009;62:264–273, please amend:

- p. 264: second author's name was misspelled, should now read 'Domenico Servello';
- p. 269 line 17 column 2: substitute 'anteromedial' with 'posteroventral';
- p. 269 line 17 column 2: substitute 'lymbic' with 'sensorimotor';
- p. 269 line 31 column 2: substitute 'Gpi' with 'anteromedial Gpi';
- p. 270 line 47 column 2: substitute 'No' with 'One';
- p. 270 line 48 column 2: add '[Diederich et al, 2005]'.
